# Supplementary material for: Ab initio molecular dynamics simulations of the initial stages of solid–electrolyte interphase formation on lithium ion battery graphitic anodes
Source: Royal Society of Chemistry journal article supplement (doi:10.1039/b925853a), 2010-01-01
Supplement: b925853a.pdf [file b925853a.pdf]

## Supporting Information for:

# *Ab initio* Molecular Dynamics Simulations of the Initial Stages of Solid-electrolyte Interphase Formation on Lithium Ion Battery Graphitic Anodes

Kevin Leung and Joanne L. Budzien

Sandia National Laboratories, MS 1415, Albuquerque, NM 87185

## Contents

|                                                          |         |
|----------------------------------------------------------|---------|
| Band Offsets between $\text{LiC}_6$ and EC .....         | page S2 |
| Average HOMO-LUMO gap in pure EC liquid .....            | page S3 |
| Finding Transition State using the Gaussian Code .....   | page S3 |
| Maximally Localized Wannier Function Analysis .....      | page S4 |
| Net Charges of EC Breakdown Products at Interfaces ..... | page S6 |

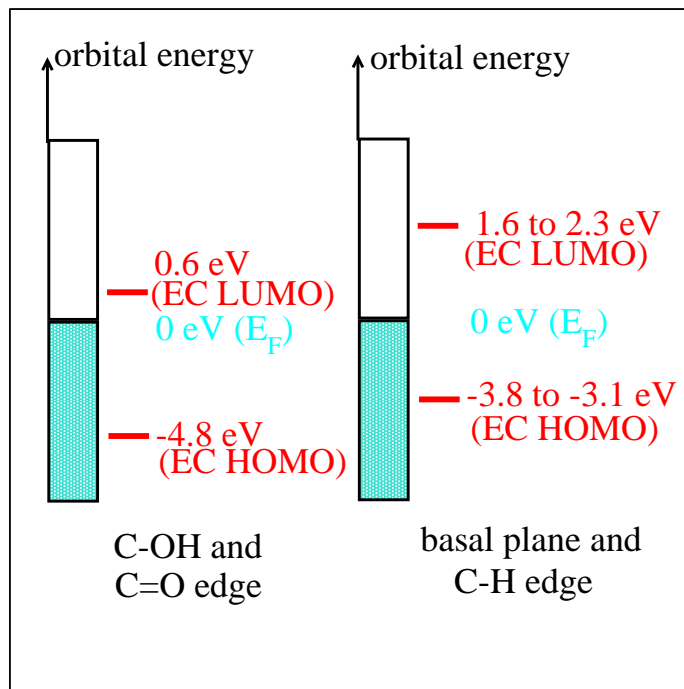

FIG. S1: Band offsets between isolated EC (red lines and text) and  $\text{LiC}_6$  (blue bands); unoccupied  $\text{LiC}_6$  bands are depicted as white.

In this electronic supporting data (ESD) document, we depict the band offsets between  $\text{LiC}_6$  model electrode and an isolated EC molecule, describe the average highest occupied molecular orbital (HOMO)-lowest unoccupied molecular orbital (LUMO) gap in pure ethylene carbonate (EC) liquid, give more details on finding transition states using the Gaussian suite of programs, discuss maximally localized Wannier function<sup>1</sup> analyses of the electronic configuration of EC breakdown products, and estimate the net charges of these products at EC- $\text{LiC}_6$  interfaces where Wannier functions cannot be readily applied. These sections are not in the same order as they are referred to in the main text for the purpose of moving the tables to the end of this document.

### S1. Band Offsets between $\text{LiC}_6$ and Isolated EC Molecule

Figure S1 represents the band offsets between  $\text{LiC}_6$  terminated in different ways and an isolated EC randomly picked out of an AIMD liquid state EC snapshot. When Li occupy all C=O edge sites, each chelated to two and one O atoms on successive graphite sheets (3 oxygen total, Fig. 3 b & c of the main text), the  $\text{LiC}_6$  Fermi level  $E_F$  is only 0.6 eV below the LUMO of the isolated EC. As the gas phase gap exceeds the instantaneous liquid phase gap by  $1.38 \pm 0.2$  eV (see Sec. S2), this edge should readily promote  $e^-$ -transfer to EC solvent. For C-OH edge  $\text{LiC}_6$ , when Li occupies every sixth edge site (Fig. 3d of the

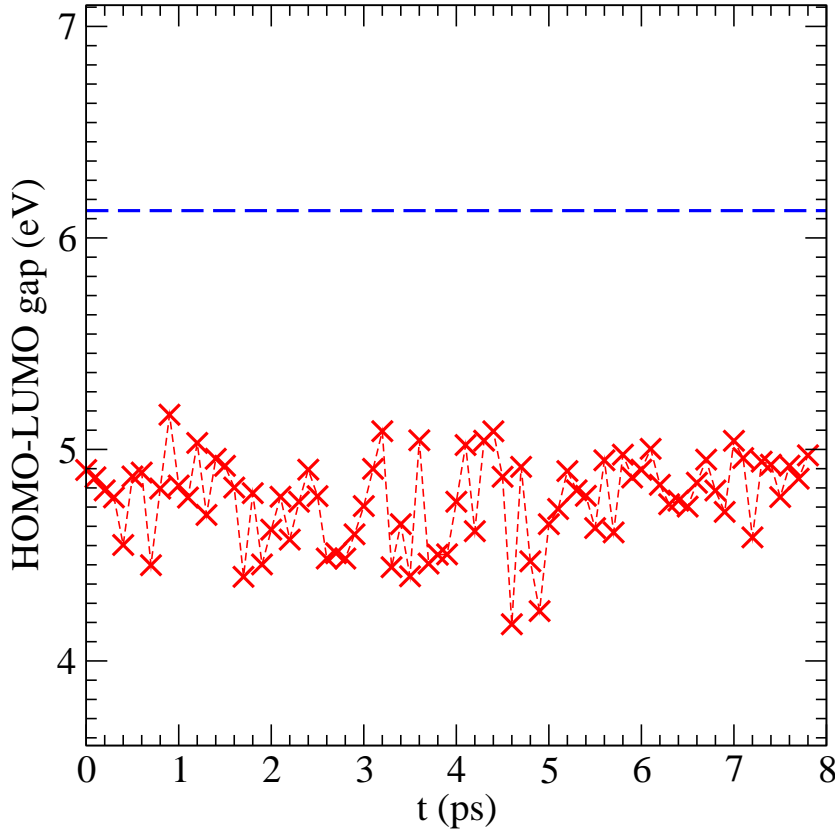

FIG. S2: Instantaneous HOMO-LUMO gap of pure EC liquid over a 8 ps portion of AIMD trajectory computed using the PBE functional (red line and crosses). The blue dashed line indicates the HOMO-LUMO gap of an isolated EC molecule in its optimized geometry.

main text), each Li chelated to 2 O atoms on two successive graphite sheet (4 O atoms in all), the band offset is similar. For the basal plane and H-terminated edge,  $E_F$  are 1.6 and 2.3 eV below the EC LUMO. We caution that local chemistry may play as large a role as band offset for EC decomposition.

## S2. Average HOMO-LUMO Gap in Pure EC Liquid

In Fig. S2, the instantaneous HOMO-LUMO gaps are depicted over a 8 ps segment of a pure EC liquid AIMD/PBE trajectory at 0.1 ps intervals. The  $15.24 \text{ \AA}^3$  simulation cell contains 32 EC molecules; other details are the same as the  $\text{Li}^+$ /32 EC simulation described in the main text except that there is no  $\text{Li}^+$  ion. As a reference, the HOMO-LUMO gap of PBE-optimized gas phase EC is also shown. The liquid state gap fluctuates between 4.1 and 5.2 eV and averages to 4.76 eV, or about 1.38 eV below the gas phase value. Further

analysis of this simulation will be described in a future publication.<sup>2</sup>

For one liquid state snapshot of this trajectory, we have also performed a hybrid functional (PBE0) calculation. The reduction of the HOMO-LUMO gap upon progressing from gas to liquid phase is predicted to be 0.85 eV with the PBE0 functional and 1.04 eV with the PBE functional for this snapshot. They are similar in magnitude, suggesting that hybrid functionals, which predict more accurate band gaps, exhibit gas-to-liquid gap shrinking comparable to PBE.

### S3. Transition State Finding using the Gaussian Code

Transition state calculation for  $\text{EC}^-$  in the gas phase, with and without a dielectric continuum treatment of the liquid state environment, are conducted using the Gaussian suite of programs, the PBE functional, 6-311++G(d,p) basis set, and the “QST2” option which searches for a transition state between two specified initial configurations. We have first used as bracketing geometries the intact  $\text{EC}^-$  and an  $\text{EC}^-$  with a broken  $\text{O}_1\text{-C}_\text{E}$  bond fully optimized (configurations 1 and 4 in Table S1, respectively). This procedure yields an inflection point with a still fully broken  $\text{O}_1\text{-C}_\text{E}$  bond (the two atoms are 2.5 Å apart, configuration 3), not a transition state. Next, using configurations 1 and 3 as the QST2 input, a true transition state (configuration 2, with a 1.73 Å distance between the  $\text{O}_1$  and  $\text{C}_\text{E}$  atoms) is obtained. Vibrational frequency calculations confirm that only one imaginary frequency, corresponding to that  $\text{C}_\text{E}\text{-O}_1$  stretching, exists in this structure. A similar procedure is applied to  $\text{EC}^-$  with a dielectric continuum approximation of the EC liquid surrounding it; only configurations 1 (intact  $\text{EC}^-$ ) and 2 (the transition state) are listed in Table S2. As dielectric continuum solution for EC is not available in the gaussian code, the EC solvent is approximated as acetonitrile which also has a large dielectric constant and does not donate hydrogen bonds. In other words, “`scrf=(pcm,solvent=acetonitrile)`” is invoked. The differences between configurations 1 and 2 are reported as the energy and free energy barriers in the main text.

### S4. Maximally Localized Wannier Analysis

Maximally localized Wannier analyses are applied to confirm the net charges on the  $\text{C}_2\text{H}_4/\text{CO}_3^{2-}$  pair (Fig. 2c),  $\text{O}(\text{C}_2\text{H}_4)\text{OCO}^{2-}$  (Fig. 2d), and the  $\text{EC}^-/\text{Li}^+$  contact ion complex (Fig. 2b) in liquid EC. In the first two cases (Tables S3 and S4), non-spin-polarized calculations are reported; for these low spin species, spin-polarized Density Functional Theory calculations with the PBE functional give identical results.  $\text{EC}^-/\text{Li}^+$  contains an odd number of electrons and require spin-polarized calculations (Tables S5 and S6).

The positions of Wannier orbital centers and the root-mean-squared spatial spread of the orbitals can be readily extracted from a customized version 4.6 VASP code prepared by Dr.

| 1. intact, $E = -342.11881\text{Ry}$           |           |           |           | 2. transition state, $E = -342.10539\text{Ry}$ |           |           |           |
|------------------------------------------------|-----------|-----------|-----------|------------------------------------------------|-----------|-----------|-----------|
| C <sub>C</sub>                                 | -0.848529 | 0.000000  | 0.000000  | C <sub>C</sub>                                 | -0.872788 | 0.040304  | -0.012474 |
| C <sub>E</sub>                                 | 1.312764  | -0.756031 | -0.109227 | C <sub>E</sub>                                 | 1.475178  | 0.709461  | 0.174204  |
| C <sub>E</sub>                                 | 1.312764  | 0.756031  | 0.109228  | C <sub>E</sub>                                 | 1.327636  | -0.757658 | -0.138672 |
| O <sub>2</sub>                                 | -2.056899 | 0.000000  | 0.000001  | O <sub>2</sub>                                 | -2.092054 | -0.036573 | 0.040115  |
| O <sub>1</sub>                                 | -0.079743 | -1.119679 | 0.097766  | O <sub>1</sub>                                 | -0.162035 | 1.147628  | -0.160112 |
| O <sub>1</sub>                                 | -0.079744 | 1.119679  | -0.097769 | O <sub>1</sub>                                 | -0.090016 | -1.093286 | 0.098765  |
| H                                              | 1.936457  | -1.303424 | 0.614558  | H                                              | 2.068004  | 1.319161  | -0.507621 |
| H                                              | 1.598091  | -1.039511 | -1.136396 | H                                              | 1.614259  | 0.972338  | 1.228901  |
| H                                              | 1.598086  | 1.039511  | 1.136399  | H                                              | 1.567275  | -0.974301 | -1.193971 |
| H                                              | 1.936458  | 1.303426  | -0.614553 | H                                              | 1.923141  | -1.411996 | 0.504202  |
| 3. inflection point, $E = -342.12753\text{Ry}$ |           |           |           | 4. broken, $E = -342.13493\text{Ry}$           |           |           |           |
| C <sub>C</sub>                                 | -0.965146 | 0.118977  | -0.000006 | C <sub>C</sub>                                 | 1.075013  | 0.067690  | -0.027506 |
| C <sub>E</sub>                                 | 1.881365  | 0.631098  | 0.000417  | C <sub>E</sub>                                 | -2.208540 | 0.093928  | -0.604781 |
| C <sub>E</sub>                                 | 1.382187  | -0.769680 | -0.000260 | C <sub>E</sub>                                 | -1.343492 | -0.054065 | 0.597436  |
| O <sub>2</sub>                                 | -2.159960 | -0.222756 | 0.000262  | O <sub>2</sub>                                 | 2.043487  | -0.657240 | -0.305846 |
| O <sub>1</sub>                                 | -0.439727 | 1.272163  | -0.000388 | O <sub>1</sub>                                 | 0.916110  | 1.301437  | 0.081139  |
| O <sub>1</sub>                                 | -0.059349 | -1.005855 | -0.000004 | O <sub>1</sub>                                 | -0.141462 | -0.773286 | 0.238697  |
| H                                              | 1.976466  | 1.190060  | -0.930370 | H                                              | -1.918871 | 0.823427  | -1.366210 |
| H                                              | 1.976215  | 1.189228  | 0.931735  | H                                              | -2.869213 | -0.720956 | -0.918265 |
| H                                              | 1.764422  | -1.304555 | -0.892902 | H                                              | -1.050180 | 0.932119  | 0.996588  |
| H                                              | 1.764746  | -1.305515 | 0.891664  | H                                              | -1.844703 | -0.647204 | 1.385076  |

TABLE S1: Energies (Ry) and coordinates (Å) of gas phase EC<sup>-</sup>.

| intact, $E = -342.17858\text{Ry}$ |           |           |           | transition state, $E = -342.19069\text{Ry}$ |           |           |           |
|-----------------------------------|-----------|-----------|-----------|---------------------------------------------|-----------|-----------|-----------|
| C <sub>C</sub>                    | 0.883568  | -0.032385 | 0.299313  | C <sub>C</sub>                              | 0.899159  | -0.002533 | -0.254571 |
| C <sub>E</sub>                    | -1.288277 | -0.765760 | 0.131645  | C <sub>E</sub>                              | -1.324129 | 0.754060  | 0.346639  |
| C <sub>E</sub>                    | -1.317842 | 0.744857  | -0.145586 | C <sub>E</sub>                              | -1.359246 | -0.704628 | 0.009624  |
| O <sub>2</sub>                    | 2.081055  | 0.016450  | -0.102403 | O <sub>2</sub>                              | 2.013540  | -0.022563 | 0.355636  |
| O <sub>1</sub>                    | 0.056860  | -1.137101 | -0.181876 | O <sub>1</sub>                              | 0.128570  | 1.104950  | -0.424484 |
| O <sub>1</sub>                    | 0.040023  | 1.170025  | 0.066485  | O <sub>1</sub>                              | 0.058128  | -1.138404 | -0.146998 |
| H                                 | -1.973896 | -1.340317 | -0.508001 | H                                           | -1.191992 | 0.996282  | 1.408631  |
| H                                 | -1.507751 | -0.979875 | 1.195629  | H                                           | -2.041316 | 1.405101  | -0.160245 |
| H                                 | -1.606126 | 0.960552  | -1.190503 | H                                           | -1.778611 | -1.334289 | 0.808090  |
| H                                 | -2.000429 | 1.284372  | 0.532986  | H                                           | -1.884691 | -0.900352 | -0.939866 |

TABLE S2: Total free energies (including solvation contributions in Ry) and coordinates (Å) of EC<sup>-</sup> using a dielectric continuum approximation.

Martijn Marsman.<sup>3</sup> The three-dimensional pictorial shapes of these orbitals are not readily available, but the Wannier centers already reveal the overall charges of the EC fragments.

Table S3 lists the positions of the C and O atoms of the well-separated  $\text{C}_2\text{H}_4/\text{CO}_3^{2-}$  pair arising from the decomposition of a single EC molecule in liquid EC (Fig. 2c of the main text), as well as all doubly-occupied Wannier orbitals ( $\phi$ ) within 1.2 Å of these atoms. Also listed are the distances  $d$  between Wannier centers and the atoms, and the root-mean-squared spatial spread  $\Omega$  of the orbitals.<sup>1</sup> Each  $\phi$  is listed only once, and is associated with the non-proton atom to which they are closest. The exceptions are two  $\phi$ 's equidistant to two  $\text{C}_\text{E}$  atoms of the  $\text{C}_2\text{H}_4$  molecule, which are the  $\sigma$  and  $\pi$  bonding orbitals between those two atoms. All  $\Omega$  are less than 1 Å<sup>2</sup>, suggesting that the Wannier functions represent localized bonding orbitals. Since C and O 1s electrons are excluded from the pseudopotentials used, the neutral C and O atoms are associated with 4 and 6 valence electrons respectively. With 6 doubly occupied valence orbitals assigned,  $\text{C}_2\text{H}_4$  contains 12 valence electrons, confirming it is a neutral species. The  $\text{C}_\text{C}$  and three O atoms are assigned 12 doubly-occupied orbitals (24 valence electrons), confirming that they indeed form a  $\text{CO}_3^{2-}$  ion with a net  $-2|e|$  charge.

Table S4 depicts the Wannier centers of  $\text{O}(\text{C}_2\text{H}_4)\text{OCO}^{2-}:\text{Li}^+$  complex in liquid EC (Fig. 2d of the main text). With 18 unique, doubly occupied valence orbitals assigned to this species, it clearly exhibits a  $-2|e|$  net charge. No Wannier centers are in the vicinity of Li, confirming it is in the  $\text{Li}^+$  charge state. Note that the orbital centered within 0.5 Å of the carbonyl carbon atom has a significant spatial spread.

Tables S5 and S6 depict the Wannier centers of the majority and minority spin channels of an intact  $\text{EC}^-\text{Li}^+$  complex in liquid EC (Fig. 1d of the main text). There are 18 up spin and 17 down spin electrons associated with  $\text{EC}^-$  and none on  $\text{Li}^+$ , confirming their  $-|e|$  and  $+|e|$  net charges respectively. The singly occupied Wannier spin-orbital representing the excess  $e^-$  is localized in the vicinity of the carbonyl carbon atom, consistent with Fig. 1d of the main text.

## S5. Net Charges of EC Breakdown Products at Interfaces

The maximally localized Wannier orbital analyses in the previous section performed for charged species in liquid EC help interpret the net charges of the same species confined between  $\text{LiC}_6$  model electrodes, where Wannier analysis cannot be readily performed. The difficulties arise from the significant increase in the number of atoms as well as the vanishing of the HOMO-LUMO gap when the metallic  $\text{LiC}_6$  electrode is present.

Our strategy for analyzing the charge states of the EC decomposition species at EC- $\text{LiC}_6$  interfaces is as follows. We first re-examine these species in the absence of the electrodes (Sec. S4) and re-compute their net charges by counting all electron density within certain cutoff radius  $r_\text{X}$  of all constituent atoms. No double counting of electrons on the VASP real-space grid is allowed. We fix  $r_\text{O}=r_\text{C}=r$ . For the  $\text{CO}_3^{2-}$  complex, setting  $1.6\text{Å} < r < 1.7\text{Å}$  yields a slowly varying net charge

| species        | $x(\text{\AA})$ | $y(\text{\AA})$ | $z(\text{\AA})$ | $d(\text{\AA})$ | $\Omega(\text{\AA}^2)$ |
|----------------|-----------------|-----------------|-----------------|-----------------|------------------------|
| C <sub>E</sub> | 6.881357        | 11.505682       | 5.793023        |                 |                        |
| $\phi$         | 6.443800        | 11.165430       | 5.266850        | 0.76425518      | 1.01802000             |
| $\phi$         | 6.663140        | 11.703960       | 6.434280        | 0.70579254      | 0.68110000             |
| $\phi$         | 6.873460        | 10.800770       | 5.585150        | 0.73496562      | 0.90204000             |
| $\phi$         | 7.421660        | 11.880880       | 5.506060        | 0.71766891      | 0.69759000             |
| C <sub>E</sub> | 6.537246        | 10.413160       | 5.099435        |                 |                        |
| $\phi$         | 6.443800        | 11.165430       | 5.266850        | 0.77631886      | 1.01802000             |
| $\phi$         | 5.999020        | 9.877800        | 5.148950        | 0.76075545      | 0.71995000             |
| $\phi$         | 6.873460        | 10.800770       | 5.585150        | 0.70654169      | 0.90204000             |
| $\phi$         | 6.899200        | 10.285190       | 4.436710        | 0.76589213      | 0.74277000             |
| C <sub>C</sub> | 8.214482        | 9.517746        | 8.410399        |                 |                        |
| O <sub>2</sub> | 8.268666        | 10.834885       | 8.428159        |                 |                        |
| $\phi$         | 8.010490        | 10.533340       | 8.509020        | 0.40512061      | 0.75825000             |
| $\phi$         | 8.391090        | 10.964030       | 8.708530        | 0.33207568      | 0.67338000             |
| $\phi$         | 8.447280        | 10.399790       | 8.363820        | 0.47471075      | 0.62845000             |
| $\phi$         | 8.204440        | 10.974640       | 8.128170        | 0.33711942      | 0.67897000             |
| O <sub>2</sub> | 7.846089        | 8.802371        | 7.361088        |                 |                        |
| $\phi$         | 8.175440        | 8.995180        | 7.602130        | 0.45138566      | 0.69404000             |
| $\phi$         | 7.828980        | 8.470940        | 7.417910        | 0.33670200      | 0.69222000             |
| $\phi$         | 7.716930        | 9.018990        | 7.721640        | 0.44000409      | 0.71372000             |
| $\phi$         | 7.771970        | 8.985700        | 7.077880        | 0.34541205      | 0.70276000             |
| O <sub>1</sub> | 8.494222        | 8.819591        | 9.492774        |                 |                        |
| $\phi$         | 8.615870        | 9.015260        | 9.749920        | 0.34526643      | 0.69753000             |
| $\phi$         | 8.560420        | 9.065160        | 9.080970        | 0.48401293      | 0.57943000             |
| $\phi$         | 8.525120        | 8.496750        | 9.427420        | 0.33083534      | 0.67962000             |
| $\phi$         | 8.186300        | 8.960380        | 9.370060        | 0.36013355      | 0.79025000             |

TABLE S3: Wannier centers of the C<sub>2</sub>H<sub>4</sub>/CO<sub>3</sub><sup>2-</sup> pair from the breakdown of an EC (Fig. 2c of the main text). Both C<sub>E</sub> atoms reside on the C<sub>2</sub>H<sub>4</sub> while the C<sub>C</sub> atom is on the CO<sub>3</sub><sup>2-</sup> as are all O atoms. Protons are omitted. Two of the doubly occupied Wannier orbitals  $\phi$  are equidistant from both C<sub>E</sub> atoms and are listed twice.

between  $-1.79|e|$  and  $-2.29|e|$ .  $r = 1.65\text{\AA}$  gives an optimal  $-2.03|e|$  charge, consistent with the number of Wannier centers residing CO<sub>3</sub><sup>2-</sup> (Sec. S4 above). Henceforce we use this cutoff radius for all C and O atoms.

When protons exist on charged species such as OC<sub>2</sub>H<sub>4</sub>OCO<sup>2-</sup> (Fig. 2d in the main text),  $r_H = 1.25\text{\AA}$  is used. These atom-electron radii are in fact similar to the Lennard Jones radii for C, H, and O atoms used in classical force fields like Ref. 4. OC<sub>2</sub>H<sub>4</sub>OCO<sup>2-</sup> is coordinated to a Li<sup>+</sup>

| species        | $x(\text{\AA})$ | $y(\text{\AA})$ | $z(\text{\AA})$ | $d(\text{\AA})$ | $\Omega(\text{\AA}^2)$ |
|----------------|-----------------|-----------------|-----------------|-----------------|------------------------|
| Li             | 7.076510        | 9.815110        | 0.873188        |                 |                        |
| C <sub>E</sub> | 5.862640        | 12.580300       | 1.340050        |                 |                        |
| $\phi$         | 5.472740        | 13.216000       | 1.481030        | 0.75895445      | 0.70957000             |
| $\phi$         | 5.435000        | 12.006940       | 1.511120        | 0.73544721      | 0.71720000             |
| $\phi$         | 6.131530        | 12.563650       | 0.653860        | 0.73718096      | 0.69336000             |
| C <sub>E</sub> | 4.975490        | 11.392600       | 1.712330        |                 |                        |
| $\phi$         | 4.273510        | 11.602670       | 1.479850        | 0.76873420      | 0.72191000             |
| $\phi$         | 5.435000        | 12.006940       | 1.511120        | 0.79312580      | 0.71720000             |
| $\phi$         | 4.964030        | 11.381470       | 2.461980        | 0.74982020      | 0.71925000             |
| C <sub>C</sub> | 8.128010        | 11.952600       | 2.467600        |                 |                        |
| $\phi$         | 8.366040        | 12.104060       | 2.888930        | 0.50706743      | 1.16876000             |
| O <sub>2</sub> | 6.945240        | 12.671400       | 2.381640        |                 |                        |
| $\phi$         | 6.860350        | 12.868870       | 2.600440        | 0.30671510      | 0.54125000             |
| $\phi$         | 6.568900        | 12.591790       | 1.953090        | 0.57586860      | 0.61475000             |
| $\phi$         | 7.113150        | 12.305360       | 2.481450        | 0.41489889      | 0.63352000             |
| $\phi$         | 7.316040        | 12.650570       | 2.242390        | 0.39663219      | 0.65266000             |
| O <sub>2</sub> | 5.395620        | 10.225900       | 1.146790        |                 |                        |
| $\phi$         | 5.255650        | 9.991800        | 1.320720        | 0.32349043      | 0.72964000             |
| $\phi$         | 5.224140        | 10.699140       | 1.380560        | 0.55498640      | 0.54671000             |
| $\phi$         | 5.720350        | 10.257020       | 1.201780        | 0.33082008      | 0.67058000             |
| $\phi$         | 5.316340        | 10.266330       | 0.829800        | 0.32924545      | 0.72515000             |
| O <sub>1</sub> | 8.351620        | 11.056800       | 1.580520        |                 |                        |
| $\phi$         | 8.387620        | 11.482500       | 1.705540        | 0.44513649      | 0.65157000             |
| $\phi$         | 8.620220        | 10.893390       | 1.631190        | 0.31845916      | 0.59539000             |
| $\phi$         | 8.164390        | 11.168320       | 1.981220        | 0.45612747      | 0.63856000             |
| $\phi$         | 8.103000        | 11.019730       | 1.355100        | 0.33763925      | 0.63355000             |

TABLE S4: Wannier centers of the  $\text{OC}_2\text{H}_4\text{OCO}^{2-}:\text{Li}^+$  complex formed after the breakdown of an EC molecule (Fig. 2d of the main text). One doubly occupied Wannier orbital  $\phi$  is equidistant from both C<sub>E</sub> atoms and is listed twice.

ion, which presents some complications. Wannier analysis suggests that no Wannier center resides within 1.2 Å of the Li<sup>+</sup>. However, this ion is 1.8-1.9 Å away from two  $\text{OC}_2\text{H}_4\text{OCO}^{2-}$  O atoms, strongly polarizing their electron clouds. But if all electron density within some arbitrary  $r_{\text{Li}}$  of the Li<sup>+</sup> is counted, electrons residing on other intact, charge-neutral EC molecules to which the Li<sup>+</sup> is also coordinated will affect the result.

We deal with this issue by adding a pseudo atomic site halfway between the Li<sup>+</sup> and the O site on the EC decomposition product. Since this Li<sup>+</sup> is coordinated to two  $\text{OC}_2\text{H}_4\text{OCO}^{2-}$  O atoms,

| species        | $x(\text{\AA})$ | $y(\text{\AA})$ | $z(\text{\AA})$ | $d(\text{\AA})$ | $\Omega(\text{\AA}^2)$ |
|----------------|-----------------|-----------------|-----------------|-----------------|------------------------|
| Li             | 6.191270        | 9.947130        | 14.831900       |                 |                        |
| C <sub>C</sub> | 5.605960        | 10.809510       | 1.615100        |                 |                        |
| $\phi$         | 5.245780        | 10.519030       | 1.909400        | 0.54838012      | 0.95111000             |
| C <sub>E</sub> | 6.747460        | 11.248100       | 3.618980        |                 |                        |
| $\phi$         | 6.246900        | 11.135950       | 4.167080        | 0.75070070      | 0.69450000             |
| $\phi$         | 7.272790        | 11.656160       | 3.873220        | 0.71212538      | 0.65181000             |
| $\phi$         | 7.026100        | 10.541400       | 3.359490        | 0.80274541      | 0.74178000             |
| C <sub>E</sub> | 7.291920        | 9.849790        | 3.048910        |                 |                        |
| $\phi$         | 7.045250        | 9.247070        | 3.394090        | 0.73706629      | 0.67813000             |
| $\phi$         | 8.016320        | 9.825940        | 3.036560        | 0.72489772      | 0.67538000             |
| $\phi$         | 7.026100        | 10.541400       | 3.359490        | 0.80339567      | 0.74178000             |
| O <sub>2</sub> | 6.033530        | 11.817200       | 2.585220        |                 |                        |
| $\phi$         | 5.788410        | 11.906080       | 2.710740        | 0.28937647      | 0.58579000             |
| $\phi$         | 5.922350        | 11.452150       | 2.238890        | 0.51533190      | 0.56219000             |
| $\phi$         | 6.318290        | 11.572570       | 2.962430        | 0.53218369      | 0.52503000             |
| $\phi$         | 6.227730        | 12.027260       | 2.441690        | 0.32006203      | 0.61137000             |
| O <sub>2</sub> | 6.820480        | 9.922400        | 1.671000        |                 |                        |
| $\phi$         | 6.722100        | 9.644430        | 1.578180        | 0.30913023      | 0.58523000             |
| $\phi$         | 6.412200        | 10.247080       | 1.671770        | 0.52164188      | 0.57986000             |
| $\phi$         | 6.977550        | 9.897890        | 2.194460        | 0.54706681      | 0.57053000             |
| $\phi$         | 7.051650        | 10.081700       | 1.504810        | 0.32624404      | 0.60295000             |
| O <sub>1</sub> | 5.234780        | 11.126340       | 0.435340        |                 |                        |
| $\phi$         | 5.196510        | 10.822900       | 0.372810        | 0.31217051      | 0.64521000             |
| $\phi$         | 5.431230        | 11.030870       | 0.900710        | 0.51407817      | 0.47862000             |
| $\phi$         | 5.504660        | 11.268450       | 0.287070        | 0.33913782      | 0.64129000             |
| $\phi$         | 5.008410        | 11.266890       | 0.532040        | 0.28345823      | 0.64044000             |

TABLE S5: Majority spin Wannier centers of the EC<sup>-</sup>:Li<sup>+</sup> complex (Fig. 1d of the main text); there is no bond breaking in the EC. One doubly occupied Wannier orbital  $\phi$  is equidistant from both C<sub>E</sub> atoms and is listed twice.

it contains two Li-O midpoint centers; their positions are further averaged to yield a single pseudo site. Setting  $r = 1.95\text{\AA}$  and including all electron density within a distance  $r$  of this pseudo site in addition to the real constituent atoms of the OC<sub>2</sub>H<sub>4</sub>OCO<sup>2-</sup>, we obtain a  $-1.91|e|$  net charge, consistent with the  $-2|e|$  obtained by just counting Wannier centers within OC<sub>2</sub>H<sub>4</sub>OCO<sup>2-</sup> (Sec. S4).

These cutoff radii allow us to assign the net charges for EC breakdown products confined between C=O terminated LiC<sub>6</sub> model electrodes. Using the same distance criteria mentioned above, we

| species        | $x(\text{\AA})$ | $y(\text{\AA})$ | $z(\text{\AA})$ | $d(\text{\AA})$ | $\Omega(\text{\AA}^2)$ |
|----------------|-----------------|-----------------|-----------------|-----------------|------------------------|
| Li             | 6.191270        | 9.947130        | 14.831900       |                 |                        |
| C <sub>C</sub> | 5.605960        | 10.809510       | 1.615100        |                 |                        |
| C <sub>E</sub> | 6.747460        | 11.248100       | 3.618980        |                 |                        |
| $\psi$         | 6.250260        | 11.137260       | 4.165590        | 0.74717858      | 0.69688000             |
| $\psi$         | 7.271110        | 11.658310       | 3.867970        | 0.71026586      | 0.65434000             |
| $\psi$         | 7.026450        | 10.541150       | 3.359680        | 0.80302566      | 0.74168000             |
| C <sub>E</sub> | 7.291920        | 9.849790        | 3.048910        |                 |                        |
| $\psi$         | 7.047080        | 9.247730        | 3.394240        | 0.73598619      | 0.67870000             |
| $\psi$         | 8.016310        | 9.827050        | 3.033140        | 0.72491839      | 0.67655000             |
| $\psi$         | 7.026450        | 10.541150       | 3.359680        | 0.80313820      | 0.74168000             |
| O <sub>2</sub> | 6.033530        | 11.817200       | 2.585220        |                 |                        |
| $\psi$         | 5.816850        | 11.404770       | 2.304250        | 0.54405227      | 0.57510000             |
| $\psi$         | 6.215230        | 11.866240       | 2.361030        | 0.29271312      | 0.66037000             |
| $\psi$         | 5.823340        | 12.010460       | 2.685170        | 0.30252151      | 0.57672000             |
| $\psi$         | 6.313850        | 11.576270       | 2.973330        | 0.53596263      | 0.52075000             |
| O <sub>2</sub> | 6.820480        | 9.922400        | 1.671000        |                 |                        |
| $\psi$         | 6.769430        | 9.642440        | 1.534110        | 0.31578882      | 0.58449000             |
| $\psi$         | 6.335050        | 10.185190       | 1.706790        | 0.55315621      | 0.59203000             |
| $\psi$         | 6.954890        | 10.156160       | 1.538790        | 0.30031528      | 0.64941000             |
| $\psi$         | 6.981430        | 9.892240        | 2.196950        | 0.55085200      | 0.56866000             |
| O <sub>1</sub> | 5.234780        | 11.126340       | 0.435340        |                 |                        |
| $\psi$         | 5.156580        | 10.905520       | 0.886240        | 0.50812156      | 0.63860000             |
| $\psi$         | 5.296640        | 10.876410       | 0.247040        | 0.31898049      | 0.59820000             |
| $\psi$         | 5.088430        | 11.377200       | 0.442500        | 0.29051734      | 0.61805000             |
| $\psi$         | 5.555500        | 11.132850       | 0.711810        | 0.42348478      | 0.64887000             |

TABLE S6: Minority spin Wannier centers of the EC<sup>-</sup>:Li<sup>+</sup> complex; there is no bond breaking in the EC. One doubly occupied Wannier orbital  $\phi$  is equidistant from both C<sub>E</sub> atoms and is listed twice.

find that the “CO<sub>3</sub><sup>2-</sup>” species in Fig. 4b of the main text has a charge of  $-1.83|e|$ , very close to the  $-2|e|$  intuitively assigned. The doubly deprotonated ethylene glycol (OC<sub>2</sub>H<sub>4</sub>O)<sup>2-</sup> coordinated to a Li<sup>+</sup> in Fig. 4a of the main text is assigned a reasonable  $-1.82|e|$  net charge with this method. The O(C<sub>2</sub>H<sub>4</sub>)OCO<sup>2-</sup> coordinated to 3 Li<sup>+</sup> on the LiC<sub>6</sub> surface, also in Fig. 4a of the main text, yields a  $-2.53|e|$  net charge. This is slightly high, and is due to the fact that these Li<sup>+</sup> ions are simultaneously coordinated to several C=O edge atoms. Nevertheless, the intuitive assignment of  $-2|e|$  net charges on all these species in Fig. 4 of the main text is fairly well borne out by the

detailed analysis presented in this section.

---

- <sup>1</sup> N. Marzari and D. Vanderbilt, *Phys. Rev. B*, 1997, **56**, 12847.
- <sup>2</sup> J. Yu, P.B. Balbuena, J. Budzien and K. Leung (unpublished).
- <sup>3</sup> K. Leung and M. Marsman, *J. Chem. Phys.* 2007, **127**, 154722.
- <sup>4</sup> T. Li and P.B. Balbuena, *J. Electrochem. Soc.*, 1999, **146**, 3613.
